# Supplementary material
Source: publisher figshare collection journal article supplement (https://sage.figshare.com/ndownloader/files/17615330)
Supplement: Supplementary file 1 [file 17615330]

# An Optimizing Dynamic Spectrum Differential Extraction Method for Noninvasive Blood Component Analysis

Wei Tang,<sup>1,2,3</sup> Qiang Chen,<sup>3</sup> Wenjuan Yan,<sup>4</sup> Guoquan He,<sup>4</sup> Gang Li,<sup>1,2</sup> and Ling Lin<sup>1,\*</sup>

<sup>1</sup> State Key Laboratory of Precision Measurement Technology and Instrument, Tianjin University, Tianjin 300072

<sup>2</sup> China and Tianjin Key Laboratory of Biomedical Detecting Techniques and Instruments, Tianjin University, Tianjin 300072, China

<sup>3</sup> The Department of Biomedical Engineering, Hefei University of Technology, Hefei 230009, China

<sup>4</sup> School of Electronic Information Engineering, Yangtze Normal University, Chongqing 408100, China

\*linling@tju.edu.cn

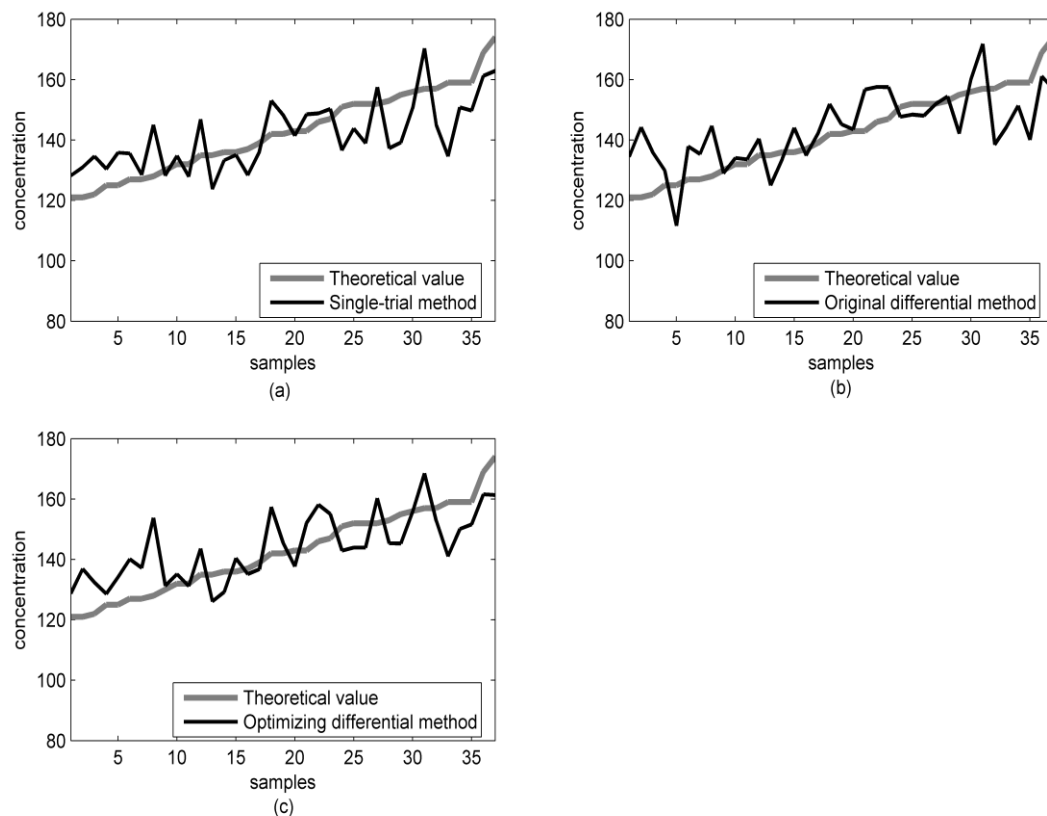

Fig. S1. Neural network modeling effect of prediction set of the three extraction methods (a) Single-trial extraction method. (b) Original differential extraction method. (c) Optimizing differential extraction method.
